# Supplementary material
Source: HighWire-hosted journal article supplement (https://www.ajnr.org/highwire/filestream/52378/field_highwire_adjunct_files/0/3522_tables.pdf)
Supplement: 3522_tables.pdf [file 3522_tables.pdf]

**On-Line Table 1: Disability assessment results compared with preintervention function**

| Type of Assessment                       | No. of Patients |      |       |
|------------------------------------------|-----------------|------|-------|
|                                          | Improved        | Same | Worse |
| Gait                                     |                 |      |       |
| G1                                       | 0               | 5    | 0     |
| G2                                       | 5               | 5    | 0     |
| G3                                       | 2               | 2    | 0     |
| G4                                       | 3               | 2    | 1     |
| G5                                       | 5               | 3    |       |
| Micturition                              |                 |      |       |
| M0                                       | 0               | 8    | 0     |
| M1                                       | 1               | 4    | 0     |
| M2                                       | 4               | 5    | 0     |
| M3                                       | 1               | 10   |       |
| MC grading                               |                 |      |       |
| Grade 1                                  | 0               | 3    | 0     |
| Grade 2                                  | 6               | 6    | 0     |
| Grade 3                                  | 3               | 4    | 0     |
| Grade 4                                  | 6               | 5    | 0     |
| mRS                                      |                 |      |       |
| 0                                        | 0               | 0    | 0     |
| 1                                        | 0               | 4    | 0     |
| 2                                        | 5               | 5    | 1     |
| 3                                        | 2               | 2    | 0     |
| 4                                        | 2               | 2    | 0     |
| 5                                        | 5               | 5    | 0     |
| 6                                        | 0               | 0    | 0     |
| Total (n=33) scale/classification grades |                 |      |       |

**On-Line Table 2: MR imaging findings before endovascular embolization in available patients (n = 15)**

| MR Imaging Findings   | No. of Patients (%) |
|-----------------------|---------------------|
| Cord edema            | 14/15 (93)*         |
| Level of cord edema   |                     |
| Conus only            | 2 (13)              |
| Low thoracic          | 7 (47)              |
| Mid thoracic          | 5 (33)              |
| High thoracic         | 0                   |
| Cord swelling         | 6/15 (40)           |
| Perimedullary vessels | 12/15 (80)          |
| Hemorrhage            | 0                   |
| Necrosis              | 0                   |

**On-Line Table 3: MR imaging results at 6-month follow-up in available patients (n=15)**

| Preintervention MR Imaging | No. of Patients<br>Preintervention | Resolution Not<br>Evident | Level of Improvement |          |        |
|----------------------------|------------------------------------|---------------------------|----------------------|----------|--------|
|                            |                                    |                           | Mild                 | Moderate | Marked |
| Conus only                 | 2                                  |                           | 1                    |          | 1      |
| Low thoracic               | 7                                  | 2                         | 1                    |          | 4      |
| Mid thoracic               | 5                                  | 3                         | 1                    | 1        |        |
| High thoracic              | 0                                  |                           |                      |          |        |
| Total                      | 14                                 | 5                         | 3                    | 1        | 5      |
| % with edema change        |                                    | 36                        | 21                   | 7        | 36     |

**On-Line Table 4: Preintervention MR imaging superior extent of cord edema compared with clinical outcome in available patients (n=15)**

| Assessment    | No. of Patients |      |       |
|---------------|-----------------|------|-------|
|               | Improved        | Same | Worse |
| Gait          |                 |      |       |
| Conus only    | 1               | 1    |       |
| Low thoracic  | 5               | 2    |       |
| Mid thoracic  | 3               | 2    |       |
| High thoracic |                 |      |       |
| None          |                 |      |       |
| Total (n=15)  | 9               | 5    |       |
| Micturition   |                 |      |       |
| Conus only    | 1               | 1    |       |
| Low thoracic  | 3               | 4    |       |
| Mid thoracic  |                 | 5    |       |
| High thoracic |                 |      |       |
| None          |                 |      |       |
| Total (n=15)  | 4               | 10   |       |
